# Supplementary material for: Design, growth, and characterization of Y2Mo4O15 crystals for Raman laser applications
Source: Royal Society of Chemistry journal article supplement (doi:10.1039/d0ra08609f), 2021-01-01
Supplement: d0ra08609f1.pdf [file d0ra08609f1.pdf]

## Supporting Information

# Design, Growth and Characterization of $\text{Y}_2\text{Mo}_4\text{O}_{15}$ Crystal for Raman laser applications

Xiangmei Wang,<sup>a</sup> Zeliang Gao,<sup>\*a</sup> Chunyan Wang,<sup>c</sup> Xiaojie Guo,<sup>a</sup> Youxuan Sun,<sup>a</sup> Yu Jia<sup>b</sup> and Xutang Tao<sup>\*a</sup>

<sup>a</sup> State Key Laboratory of Crystal Materials, Shandong University, Jinan, 250100, China

<sup>b</sup> Key Laboratory for Special Functional Materials of Ministry of Education, and School of Materials Science and Engineering, Henan University, Kaifeng, Henan, 475001, China

<sup>c</sup> International Laboratory for Quantum Functional Materials of Henan, and School of Physics and Microelectronics, Zhengzhou University, Zhengzhou, 450001, China

Corresponding Authors\*: [txt@sdu.edu.cn](mailto:txt@sdu.edu.cn) (X. Tao); [gaozeliang@sdu.edu.cn](mailto:gaozeliang@sdu.edu.cn) (Z. Gao)

## CONTENTS

**Table S1. Crystal Data and Structure Refinement for  $\text{Y}_2\text{Mo}_4\text{O}_{15}$**

**Table S2. Selected bond lengths (Å) and angles (deg.) in  $\text{Y}_2\text{Mo}_4\text{O}_{15}$**

**Table S3. Atomic displacement parameters (Å<sup>2</sup>) for  $\text{Y}_2\text{Mo}_4\text{O}_{15}$**

**Table S1. Crystal Data and Structure Refinement for Y<sub>2</sub>Mo<sub>4</sub>O<sub>15</sub>**

| Empirical formula                        | Y <sub>2</sub> Mo <sub>4</sub> O <sub>15</sub>                                                                                        |
|------------------------------------------|---------------------------------------------------------------------------------------------------------------------------------------|
| Formula weight                           | 801.58                                                                                                                                |
| Temperature                              | 293 K                                                                                                                                 |
| Wavelength                               | 0.71073 Å                                                                                                                             |
| Crystal system                           | Monoclinic                                                                                                                            |
| Space group                              | <i>P2<sub>1</sub>/c</i> (No. 14)                                                                                                      |
| Unit cell dimensions                     | <i>a</i> = 6.8110(4) Å, $\alpha$ = 90.00°<br><i>b</i> = 9.5833(5) Å, $\beta$ = 105.512(7)°<br><i>c</i> = 10.5124(6) Å, $\gamma$ = 90° |
| Volume                                   | 661.17(8) Å <sup>3</sup>                                                                                                              |
| <i>Z</i>                                 | 2                                                                                                                                     |
| Density (calculated)                     | 4.026 g/cm <sup>3</sup>                                                                                                               |
| Absorption coefficient                   | 12.429 mm <sup>-1</sup>                                                                                                               |
| F(000)                                   | 732                                                                                                                                   |
| Crystal size                             | 0.02 × 0.04 × 0.05 mm <sup>3</sup>                                                                                                    |
| $\theta$ range for data collection       | 2.903 to 30.323°                                                                                                                      |
| Index ranges                             | -8 ≤ <i>h</i> ≤ 8,<br>-11 ≤ <i>k</i> ≤ 10,<br>-13 ≤ <i>l</i> ≤ 13                                                                     |
| Reflections collected                    | 5250                                                                                                                                  |
| <i>R</i> <sub>int</sub>                  | 0.1013                                                                                                                                |
| Data / restraints / parameters           | 1342 / 0 / 98                                                                                                                         |
| Goodness-of-fit                          | 1.076                                                                                                                                 |
| Final <i>R</i> indices [ $>2\sigma(I)$ ] | <i>R</i> <sub>obs</sub> = 0.0531, <i>wR</i> <sub>obs</sub> = 0.1280                                                                   |
| <i>R</i> indices [all data]              | <i>R</i> <sub>all</sub> = 0.0563, <i>wR</i> <sub>all</sub> = 0.1306                                                                   |
| Extinction coefficient                   | 0.257(11)                                                                                                                             |
| Largest diff. peak and hole              | 2.188 and -2.120 e.Å <sup>-3</sup>                                                                                                    |

$R = \Sigma||F_o| - |F_c|| / \Sigma|F_o|$ ,  $wR = \{\Sigma[w(|F_o|^2 - |F_c|^2)^2] / \Sigma[w(|F_o|^4)]\}^{1/2}$  and calc  
 $w = 1 / [\sigma^2(F_o^2) + (0.0503P)^2 + 0.0000P]$  where  $P = (F_o^2 + 2F_c^2) / 3$

**Table S2. Selected bond lengths (Å) and angles (deg.) in Y<sub>2</sub>Mo<sub>4</sub>O<sub>15</sub>**

|                                        |            |                                           |            |
|----------------------------------------|------------|-------------------------------------------|------------|
| Mo1—O2                                 | 178.3(7)   | Mo1—O6                                    | 1.735(6)   |
| Mo1—O3                                 | 1.746(6)   | Y1—O2 <sup>iii</sup>                      | 2.316(6)   |
| Mo1—O7                                 | 1.763(7)   | Y1—O3 <sup>iv</sup>                       | 2.268(6)   |
| Mo1—O8                                 | 1.750(6)   | Y1—O4 <sup>v</sup>                        | 2.342(7)   |
| Mo2—Y1 <sup>i</sup>                    | 3.5377(11) | Y1—O5                                     | 2.301(7)   |
| Mo2—O1                                 | 1.8665(7)  | Y1—O6 <sup>vi</sup>                       | 2.355(7)   |
| Mo2—O2 <sup>ii</sup>                   | 2.508(7)   | Y1—O7                                     | 2.260(6)   |
| Mo2—O4                                 | 1.735(6)   | Y1—O8 <sup>vi</sup>                       | 2.247(6)   |
| Mo2—O5                                 | 1.737(7)   | O4 <sup>v</sup> —Y1—O6 <sup>vi</sup>      | 142.5(2)   |
| O3—Mo1—O2                              | 110.6(3)   | O5—Y1—Mo2 <sup>v</sup>                    | 90.51(17)  |
| O3—Mo1—O7                              | 109.1(3)   | O5—Y1—O2 <sup>iii</sup>                   | 131.6(2)   |
| O3—Mo1—O8                              | 110.0(3)   | O5—Y1—O4 <sup>v</sup>                     | 74.6(2)    |
| O7—Mo1—O2                              | 110.4(3)   | O5—Y1—O6 <sup>vi</sup>                    | 141.0(2)   |
| O8—Mo1—O2                              | 109.0(3)   | O6 <sup>vi</sup> —Y1—Mo2 <sup>v</sup>     | 120.83(15) |
| O8—Mo1—O7                              | 107.7(3)   | O7—Y1—Mo2 <sup>v</sup>                    | 89.21(18)  |
| O1—Mo2—Y1 <sup>i</sup>                 | 87.35(3)   | O7—Y1—O2 <sup>iii</sup>                   | 83.0(2)    |
| O1—Mo2—O2                              | 75.14(16)  | O7—Y1—O3 <sup>iv</sup>                    | 96.1(3)    |
| O2 <sup>ii</sup> —Mo2—Y1               | 40.75(14)  | O7—Y1—O4 <sup>v</sup>                     | 104.4(2)   |
| O4—Mo2—Y1 <sup>i</sup>                 | 35.1(2)    | O7—Y1—O5                                  | 77.5(3)    |
| O4—Mo2—O1                              | 113.1(2)   | O7—Y1—O6                                  | 80.1(3)    |
| O4—Mo2—O2 <sup>ii</sup>                | 73.1(3)    | O8 <sup>vi</sup> —Y1—Mo2 <sup>v</sup>     | 96.83(16)  |
| O4—Mo2—O5                              | 114.1(3)   | O8 <sup>vi</sup> —Y1—O2 <sup>iii</sup>    | 90.1(2)    |
| O4—Mo2—O6                              | 105.1(3)   | O8 <sup>vi</sup> —Y1—O3 <sup>iv</sup>     | 82.3(2)    |
| O5—Mo2—Y1 <sup>i</sup>                 | 108.7(2)   | O8 <sup>vi</sup> —Y1—O4 <sup>v</sup>      | 87.2(2)    |
| O5—Mo2—O1                              | 115.6(2)   | O8 <sup>vi</sup> —Y1—O5                   | 118.1(2)   |
| O5—Mo2—O2 <sup>ii</sup>                | 79.3(3)    | O8 <sup>vi</sup> —Y1—O6 <sup>vi</sup>     | 83.2(2)    |
| O6—Mo2—Y1 <sup>i</sup>                 | 136.7(2)   | O8 <sup>vi</sup> —Y1—O7                   | 163.1(3)   |
| O6—Mo2—O1                              | 103.5(2)   | Mo2 <sup>vii</sup> —O1—Mo2                | 180        |
| O6—Mo2—O2 <sup>ii</sup>                | 176.8(3)   | Mo1—O1—Mo2 <sup>viii</sup>                | 130.0(3)   |
| O6—Mo2—O5                              | 103.9(3)   | Mo4—O2—Y1 <sup>iii</sup>                  | 135.6(4)   |
| O2 <sup>iii</sup> —Y1—Mo2 <sup>v</sup> | 44.99(18)  | Y1 <sup>iii</sup> —O2—Mo2 <sup>viii</sup> | 94.3(2)    |
| O2 <sup>iii</sup> —Y1—O4 <sup>v</sup>  | 68.0(2)    | Mo1—O3—Y1 <sup>i x</sup>                  | 164.7(4)   |
| O2 <sup>iii</sup> —Y1—O6 <sup>vi</sup> | 75.9(2)    | Mo2—O4—Y1 <sup>i</sup>                    | 119.7(3)   |
| O3—Y1—Mo2 <sup>v</sup>                 | 163.98(18) | Mo2—O5—Y1                                 | 143.6(4)   |
| O3—Y1—O2 <sup>iii</sup>                | 150.6(3)   | Mo2—O6—Y1 <sup>x</sup>                    | 163.5(4)   |
| O3—Y1—O4                               | 139.3(2)   | Mo1—O7—Y1                                 | 147.8(4)   |
| O3 <sup>iv</sup> —Y1—O5                | 76.0(2)    | Mo1—O8—Y1 <sup>x</sup>                    | 144.9(4)   |
| O3 <sup>iv</sup> —Y1—O6                | 75.1(2)    |                                           |            |
| O4—Y1—Mo2 <sup>v</sup>                 | 25.21(16)  |                                           |            |

(i) 2-x, -0.5+y, 1.5-z; (ii) 1+x, 1.5-y, 0.5+z; (iii) 1-x, 2-y, 1-z; (iv) x, 1.5-y, 0.5+z;  
(v) 2-x, 0.5+y, 1.5-z; (vi) 1-x, 0.5+y, 1.5-z; (vii) 2-x, 1-y, 2-z; (viii) -1+x, 1.5-y, -0.5+z;  
(ix) x, 1.5-y, -0.5+z; (x) 1-x, -0.5+y, 1.5-z.

**Table S3. Atomic displacement parameters ( $\text{\AA}^2$ ) for  $\text{Y}_2\text{Mo}_4\text{O}_{15}$**

| Atom | U <sup>11</sup> | U <sup>22</sup> | U <sup>33</sup> | U <sup>12</sup> | U <sup>13</sup> | U <sup>23</sup> |
|------|-----------------|-----------------|-----------------|-----------------|-----------------|-----------------|
| Mo1  | 0.0125(5)       | 0.0143(5)       | 0.0097(5)       | 0.0002(2)       | 0.0032(4)       | 0.0013(2)       |
| Mo2  | 0.0104(5)       | 0.0150(5)       | 0.0117(5)       | 0.0004(2)       | 0.0012(4)       | 0.0008(3)       |
| Y1   | 0.0112(6)       | 0.0135(5)       | 0.0106(5)       | 0.0005(3)       | 0.0031(4)       | 0.0002(3)       |
| O1   | 0.019(6)        | 0.029(5)        | 0.022(5)        | 0.014(4)        | -0.003(4)       | -0.001(4)       |
| O2   | 0.019(4)        | 0.019(3)        | 0.021(3)        | 0.006(2)        | 0.008(3)        | -0.002(3)       |
| O3   | 0.023(4)        | 0.023(3)        | 0.020(3)        | -0.006(2)       | 0.010(3)        | 0.001(3)        |
| O4   | 0.010(3)        | 0.031(4)        | 0.017(3)        | -0.010(3)       | 0.005(3)        | -0.001(3)       |
| O5   | 0.015(4)        | 0.021(3)        | 0.024(3)        | 0.004(2)        | 0.003(3)        | 0.005(2)        |
| O6   | 0.008(3)        | 0.032(4)        | 0.022(3)        | -0.006(3)       | 0.008(3)        | 0.000(3)        |
| O7   | 0.023(4)        | 0.026(4)        | 0.016(3)        | -0.008(3)       | 0.002(3)        | -0.002(3)       |
| O8   | 0.018(4)        | 0.028(3)        | 0.019(3)        | 0.011(3)        | 0.010(3)        | 0.011(3)        |
